# Supplementary material for: Berberine protects against diabetic kidney disease via promoting PGC‐1α‐regulated mitochondrial energy homeostasis
Source: PubMed Central journal article supplement (PMC7393204; doi:10.1111/bph.14935), 2020-07-07
Supplement: BPH-177-3646-s001.pdf [file BPH-177-3646-s001.pdf]

## Supporting Information

**Table S1. Primers for RT-PCR assay.**

| Primer         | Probe ID       | Forward (5'→3')           | Reverse (5'→3')         |
|----------------|----------------|---------------------------|-------------------------|
| CPT1           | NM_013495      | CTACATCACCCCAACCCATATT    | GATCCCAGAAGACGAATAGGTT  |
| CPT2           | NM_009949.2    | TGTCTTTGATGTCCTCGATCAA    | TCGGTTCTCACTGGTCAAATAA  |
| ACADL          | NM_007381.4    | AAACAGTTGCACACATACAGAC    | ATTCAGATGCCCAGTATTTTGC  |
| ACADM          | NM_007382.5    | TCAGAGTGCCTAAGGAAAATGT    | CGACTGTAGGTCTGGTTCTATC  |
| ACSL1          | NM_001302163   | AATATCTACCTGCGGAGTGAAG    | TTCTTCGAAGGACCCTTGTAAG  |
| ACOX1          | NM_001271898   | CCAATGCTGGTATCGAAGAATG    | CGACTGAACCTGGTCATAGATT  |
| Slc27a2        | NM_011978      | CCCAGGATGTCATCTATACCAC    | CAATGTACTGAATGACCGTGAC  |
| TFB1m          | NM_146074.1    | CAGCACAGTCGCCTTTCCATT     | AACAGCCTTCCAGTGCTTTTCG  |
| TFB2m          | NM_001331054.1 | CCAAAACCCATCCCGTCAAAT     | ATGTTCCCTCTGTAAGGGCTCCA |
| COX4i1         | NM_009941.3    | GGGAGTGTTGTGAAGAGTGAAGACT | TCGTGACATGGGCCACATC     |
| AMPK           | NM_001356568.1 | GCCGAGAAGCAGAAGCACGAC     | CACCACGTCAAGGCTCCGAATC  |
| PPAR $\alpha$  | NM_001113418.1 | GAGCTGCAAGATTCAGAAGAAG    | GAATCTTTCAGGTCGTGTTTAC  |
| PPAR $\gamma$  | NM_001127330.2 | CCAAGAATACCAAAGTGCGATC    | TCACAAGCATGAACTCCATAGT  |
| PGC-1 $\alpha$ | NM_008904.2    | CAACCGCAGTCGCAACATG       | CCCTTTCTTGGTGGAGTGCC    |
| CD36           | NM_001159555.1 | CTTTGAAAGAACTCTTGTGGGG    | GTCTGTGCCATTAATCATGTCCG |
| FATP1          | NM_001357180.1 | CCTCTCTGTTCTGATTCGTGTT    | GTCCAGCATATACCACTACTGG  |
| $\beta$ -actin | NM_007393.3    | GTGACGTTGACATCCGTAAAGA    | GTAACAGTCCGCCTAGAAGCAC  |
| 18S rRNA       | NR_003278      | GGCGGCTTGGTGACTCTAGATAAC  | CCTGCTGCCTTCCTTGGATGTG  |

CPT1, carnitine palmitoyltransferase 1; CPT2, carnitine palmitoyltransferase 2; ACADL, acyl-Coenzyme A dehydrogenase, long chain; ACADM, acyl-Coenzyme A dehydrogenase, medium chain; ACSL1, acyl-CoA synthetase long-chain family member 1; ACOX1, acyl-Coenzyme A oxidase 1; Slc27a2, solute carrier family 27 (fatty acid transporter), member 2; TFB1m, transcription factor B1, mitochondrial; TFB2m, transcription factor B2, mitochondrial; COX4i1, cytochrome c oxidase subunit 4i1; AMPK, AMP-activated protein kinase; PPAR $\alpha$ , peroxisome proliferator activated receptor alpha; PPAR $\gamma$ , peroxisome proliferator activated receptor gamma; PGC1 $\alpha$ , peroxisome proliferator-activated receptor- $\gamma$  co-activator 1 $\alpha$ ; CD36, cluster of differentiation 36; FATP1, fatty acid transport protein 1.

**Table S2. Clinical characteristics of participants.**

|                                    | Health        | DKD           | <i>P</i> values |
|------------------------------------|---------------|---------------|-----------------|
| Number of participants (n)         | 15            | 20            |                 |
| Male/female (n)                    | (8/7)         | (9/11)        |                 |
| Mean age (years)                   | 45.87 ± 5.54  | 55.7 ± 8.29   | <0.05           |
| BMI (kg/m <sup>2</sup> )           | 22.58 ± 3.43  | 23.75 ± 2.99  | NS              |
| Systolic blood pressure (mmHg)     | 122.6 ± 14.56 | 123.15 ± 9.37 | NS              |
| Diastolic blood pressure (mmHg)    | 76.13 ± 11.01 | 77.7 ± 8.97   | NS              |
| FBG (mmol/L)                       | 5.22 ± 0.32   | 6.35 ± 0.82   | <0.05           |
| HbA1c (%)                          | 5.00 ± 0.90   | 6.69 ± 0.92   | <0.05           |
| TC (mmol/L)                        | 5.00 ± 0.9    | 4.26 ± 0.98   | NS              |
| TG (mmol/L)                        | 1.16 ± 0.47   | 1.55 ± 0.83   | NS              |
| HDL-C (mmol/L)                     | 1.45 ± 0.38   | 1.12 ± 0.24   | <0.05           |
| LDL-C (mmol/L)                     | 3.04 ± 0.71   | 2.93 ± 1.78   | NS              |
| Urea (mmol/L)                      | 5.17 ± 0.99   | 5.45 ± 1.39   | NS              |
| Serum creatinine (umol/L)          | 72.27 ± 14.97 | 74 ± 19.74    | NS              |
| eGFR (ml/min/1.73 m <sup>2</sup> ) | 98.63 ± 8.23  | 90.33 ± 14.5  | NS              |
| AER (mg/24h)                       | ND            | 76.59 ± 40.51 |                 |

NS, no significant. ND, undetected. DKD, diabetic kidney diseases; FBG, fasting blood glucose; HbA1c, glycated hemoglobin; TC, total cholesterol; TG, triglyceride; HDL-C, high-density lipoprotein cholesterol; LDL-C, low-density lipoprotein cholesterol; eGFR, estimated glomerular filtration rate; AER, 24 h albumin excretion ratio

Figure S1. OPLS-DA scatter plot

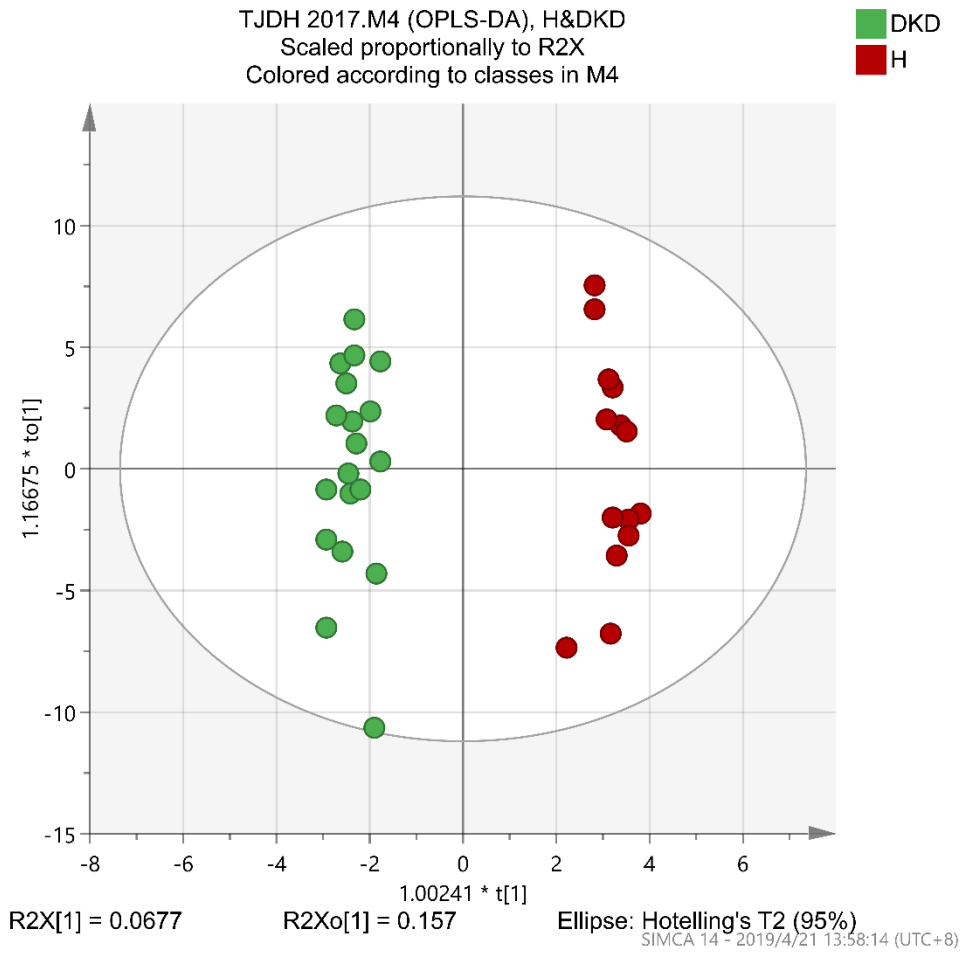

H, healthy controls; DKD, diabetic kidney diseases.
